# Supplementary material for: Visible light driven efficient photocatalytic degradation of Congo red dye catalyzed by hierarchical CuS–Bi2CuxW1−xO6−2x nanocomposite system
Source: Royal Society of Chemistry journal article supplement (doi:10.1039/c6ra02612e), 2016-01-01
Supplement: c6ra02612e1.pdf [file c6ra02612e1.pdf]

## Supplementary Data

### Visible light driven efficient photocatalytic degradation of congo red dye catalyzed by hierarchical $\text{CuS-Bi}_2\text{Cu}_x\text{W}_{1-x}\text{O}_{6-2x}$ nanocomposite system

Yagna Prakash Bhoi, Swaraj Rashmi Pradhan, Chinmaya Behera and B.G. Mishra\*  
*Department of Chemistry, National Institute of Technology, Rourkela-769008, Odisha, India.*  
\*Corresponding author, Email: brajam@nitrkl.ac.in

---

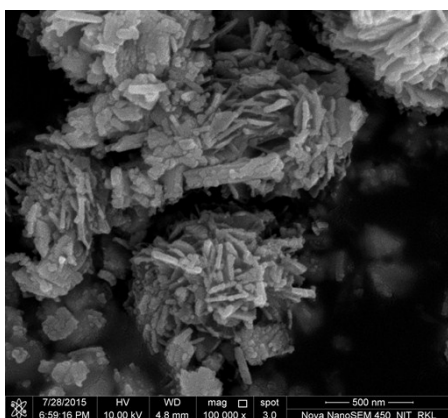

(a)

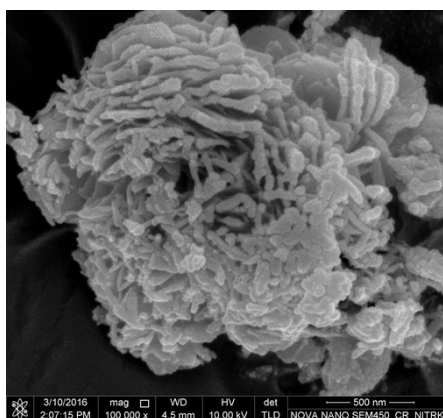

(b)

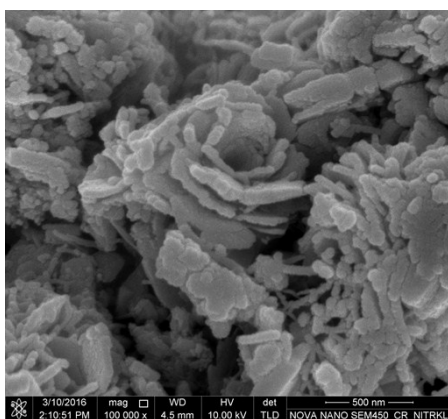

(c)

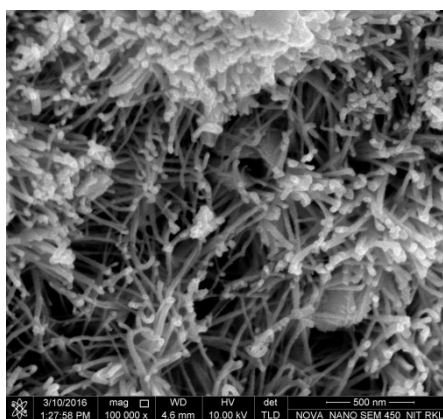

(d)

**Fig. S1** FESEM image of (a) CuS5BT, (b) CuS15BT, (c) CuS20BT and (d) CuS materials.

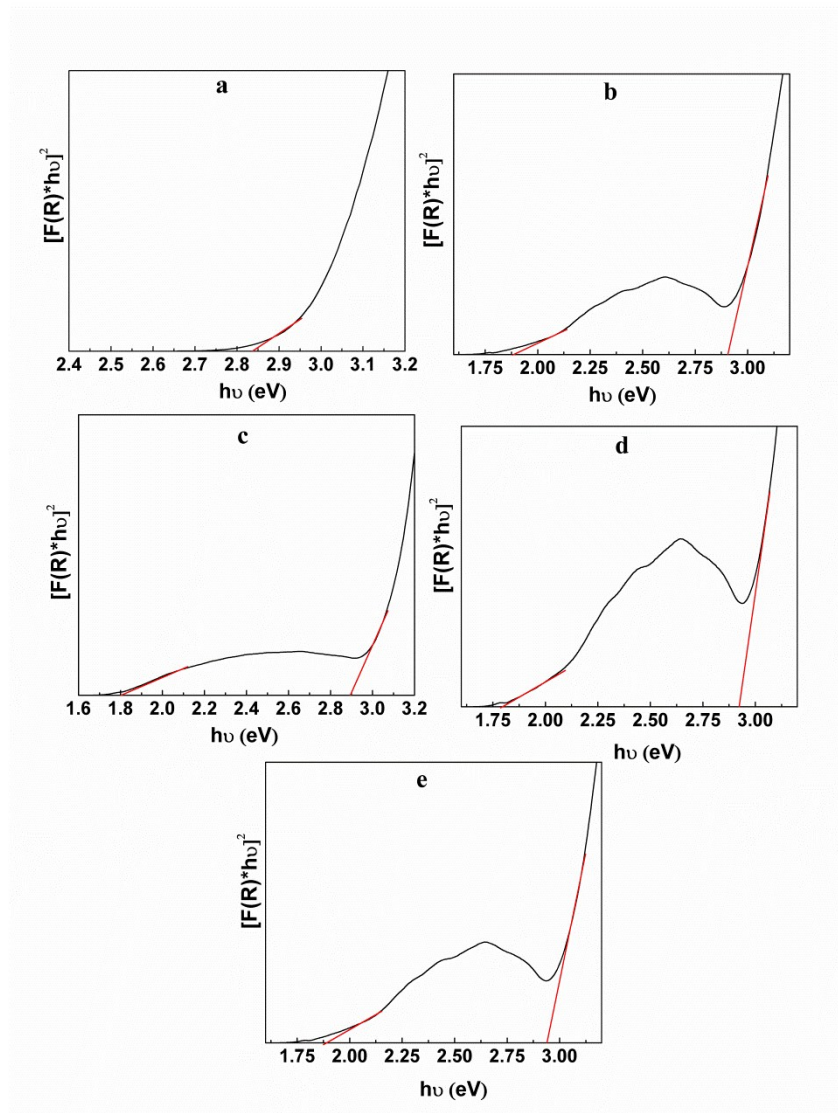

**Fig. S2** Plot of  $[F(R)hv]^2$  as a function of photon energy ( $h\nu$ ) in eV of (a) BT, (b) CuS5BT, (c) CuS10BT, (d) CuS15BT and (e) CuS15BT.

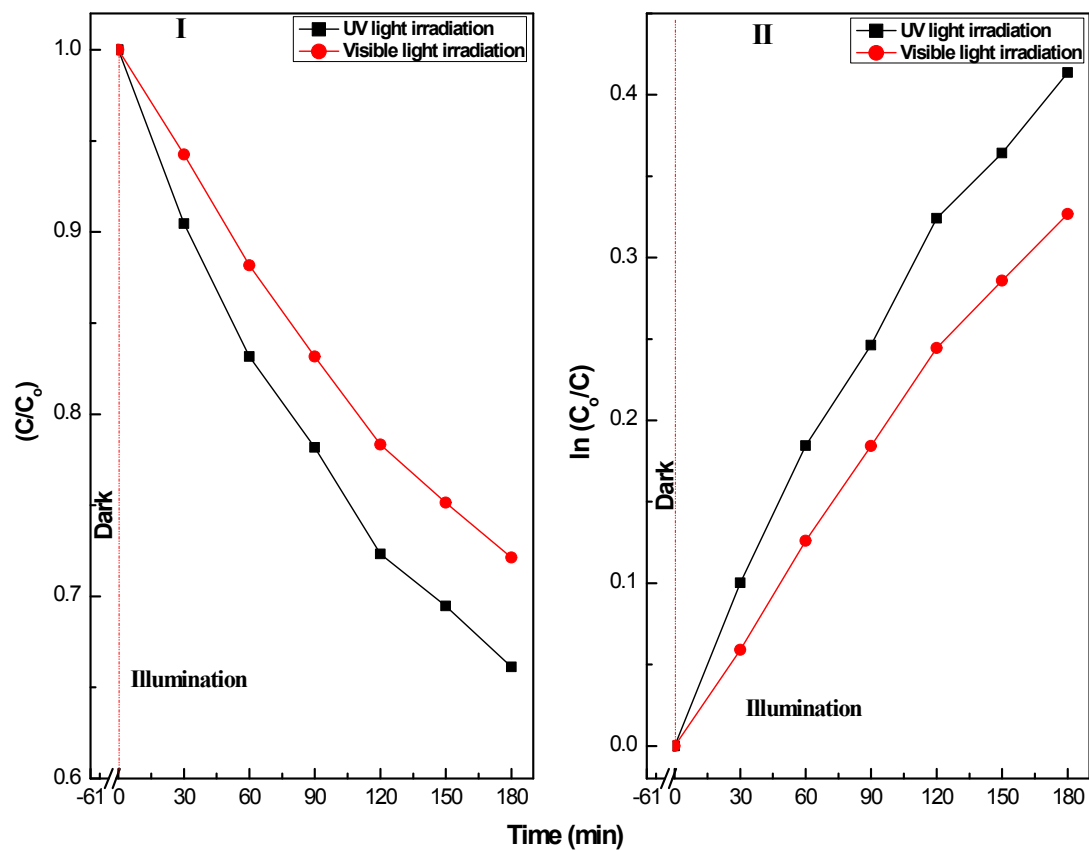

**Fig. S3** (I) Photocatalytic activity of CuS10BT material in absence of H<sub>2</sub>O<sub>2</sub> oxidant and (II) First order kinetic plots.
